# Supplementary material for: Large-Scale Screening for Targeted Knockouts in the Caenorhabditis elegans Genome
Source: PubMed Central journal article supplement (PMC3484672; doi:10.1534/g3.112.003830), 2012-11-01
Supplement: supp_2.11.1415_003830SI.pdf [file supp_2.11.1415_003830SI.pdf]

**Tables S1 and S2**

Available for download at <http://www.g3journal.org/lookup/suppl/doi:10.1534/g3.112.003830/-/DC1>.
